# Supplementary material
Source: publisher figshare collection journal article supplement (https://karger.figshare.com/articles/dataset/_/3988986)
Supplement: Supplementary file 1 [file 1]

Pantodon buchholzi 1 - mixed-le  
 Pantodon buchholzi 2 - mixed-le  
 Pantodon buchholzi 7 - mixed-le  
 Niger gi|326535638|gb|GU997114  
 Odzala gi|326535640|gb|GU99711

10 20 30 40 50 60 70 80 90 100  
 -----CCYTTTWA--ATAGCGGTGAGAGCTCTGGGAAAAGGCGTGTGCGAGGTGGAGGGAAGCAAAAGGT  
 -----  
 -----  
 TTCTATGGTGTCCGCTCTTATGGAGAGGAAGATATT TA  
 -----GCTCTTATGGAGAGGAAGATATT TA...T...C...A...A...

110 120 130 140 150 160 170 180 190 200  
 CTGCTGAGGGACAGGTTGATGGAGCTGATGACATGAGCTCTTCTCTGAGGACAGTCTGATGAACACTTAAGTGCAATTAGCCAAATGTACAGAGGAAGA  
 -----  
 -----  
 -----G...G...  
 -----

210 220 230 240 250 260 270 280 290 300  
 CTCCTACTACTATAATTTTACCCGTACTATAATAATCCCAAGTGGGATATCTTCTGAGGAGGATAGAACAGTGCCCTGGCTAACGGGTCCGACGTG  
 -----  
 -----  
 -----  
 Niger gi|326535638|gb|GU997114  
 Odzala gi|326535640|gb|GU99711

-----T...A...A...A...G...A...  
 -----

310 320 330 340 350 360 370 380 390 400  
 CAGAGGTTTCTAAACACGACGATAGGAGAGGAGATGATTGTTGATATCTGGATTGGAAAGAACAGAGGTTTGGGACGACCTAGGATTGGCCAACTAGATG  
 -----  
 -----  
 -----K...  
 -----A...T...G...T...G...A...C...

410 420 430 440 450 460 470 480 490 500  
 GAATTGATGACAGTTCTGAAAGCGATGCCACGACCAAGTGCACCAACCCACCAATTTACTGCAACCAACATCTTCTCCACAAAGAGCAAAAGAAAGGGCAG  
 -----  
 -----  
 -----  
 Niger gi|326535638|gb|GU997114  
 Odzala gi|326535640|gb|GU99711

-----G...A...T...T...T...T...  
 -----

510 520 530 540 550 560 570 580 590 600  
 GGAAATAAGACAGAGAACTCAATGTAGAGTCTGAGAAAGATGTGCAAAATAGCAGTGGTGCTACTGTAGGAAAGCAACAGGAAACATAAAC-----CGT  
 -----  
 -----  
 -----  
 Niger gi|326535638|gb|GU997114  
 Odzala gi|326535640|gb|GU99711

-----G...G...G...A...G...C...C...TG...AATGGC  
 -----

610 620 630 640 650 660 670 680 690 700  
 GAAGGCAGGAAACACTCGAAGGAAAACCTGCTTGCACCTGGGGGGTATGAAGTCACAAAGGACAAGATCATCTAGATTCCAGTTGCTCTCAACACAGAAC  
 -----  
 -----  
 -----  
 Niger gi|326535638|gb|GU997114  
 Odzala gi|326535640|gb|GU99711

-----K...T...A...G...G...  
 -----

TACTTAAAT 665  
 ----- 665  
 ----- 665  
 ----- 665  
 Niger gi|326535638|gb|GU997114 703  
 Odzala gi|326535640|gb|GU99711 687
